# Supplementary material for: Enhancing the efficiency of CZTSSe solar cells via binary solvent induced microstructure regulation
Source: Royal Society of Chemistry journal article supplement (doi:10.1039/d5tc00100e), 2025-01-01
Supplement: d5tc00100e1.pdf [file d5tc00100e1.pdf]

## Supplementary Information

### Enhancing the Efficiency of CZTSSe Solar Cells via Binary Solvents induced Microstructure Regulation

Sijie Ge\*, Xuanzhi He, Qianli Zhang, Junjie Lin, Yuchang Zeng, Yudiao

Lin, Conglong Lin, Yan Zhang, Xianzhong Lin

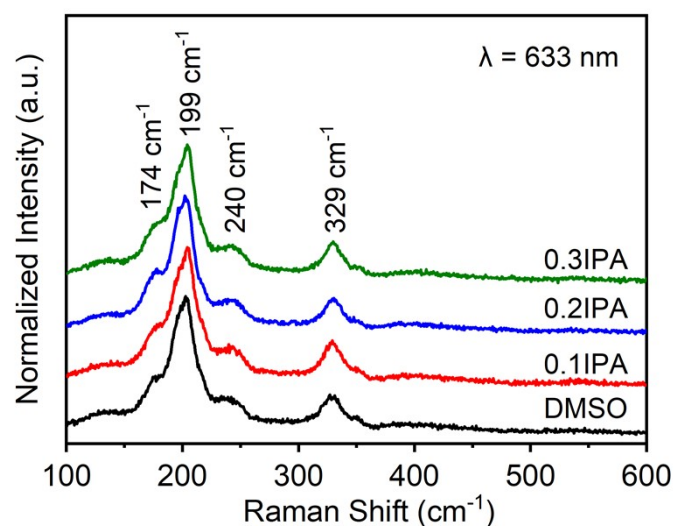

Figure S1 Raman spectra of the CZTSSe thin films fabricated from precursor solutions with varying IPA ratios.

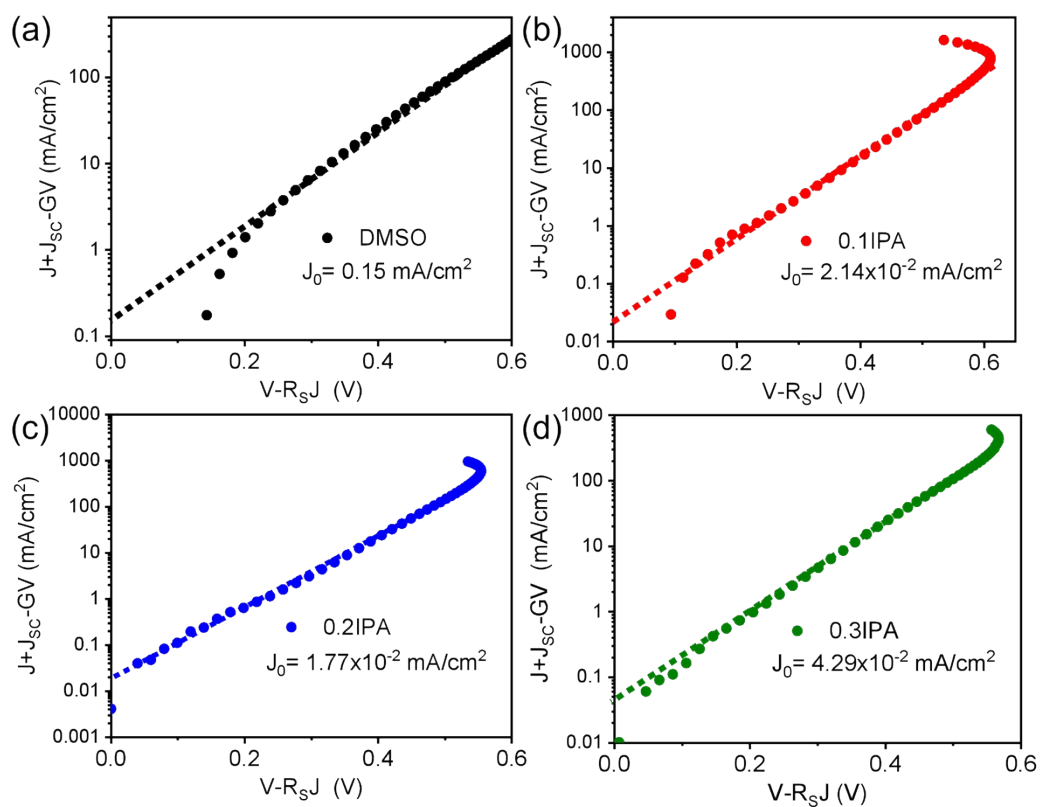

Figure S2 The plots of  $J + J_{SC} - GV$  versus  $V - R_s J$ .
